# Supplementary material for: Evidence for widespread subfunctionalization of splice forms in vertebrate genomes
Source: HighWire-hosted journal article supplement (doi:10.1101/gr.184473.114), 2015-03-19
Supplement: Supp_Fig1.docx [file Supp_Fig1.docx]

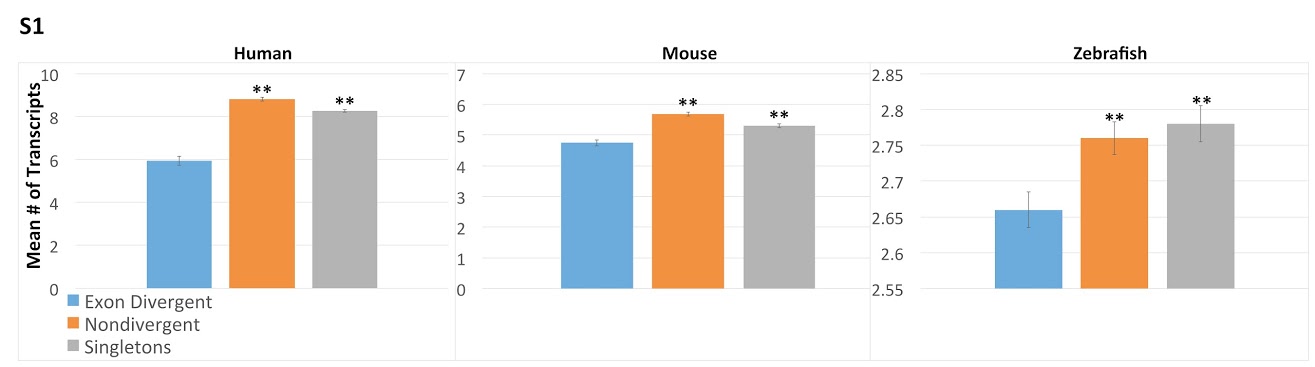


**Supplemental figure 1. The mean number of transcripts, excluding genes with one transcript**. Histograms comparing the number of transcripts between exon divergent (blue), nondivergent paralogs (orange) and singletons (grey), omitting those genes with a single transcript. In each species the nondivergent paralogs have significantly fewer transcripts per gene using this measure. Student’s *t*-test was used to calculate the significance of the differences in mean number of transcripts. The asterisks indicate the significance of the difference as compared to exon divergent paralogs, **p < .01 *p< .05.
