# Supplementary material for: Evidence for widespread subfunctionalization of splice forms in vertebrate genomes
Source: HighWire-hosted journal article supplement (doi:10.1101/gr.184473.114), 2015-03-19
Supplement: Supp_Fig3.docx [file Supp_Fig3.docx]

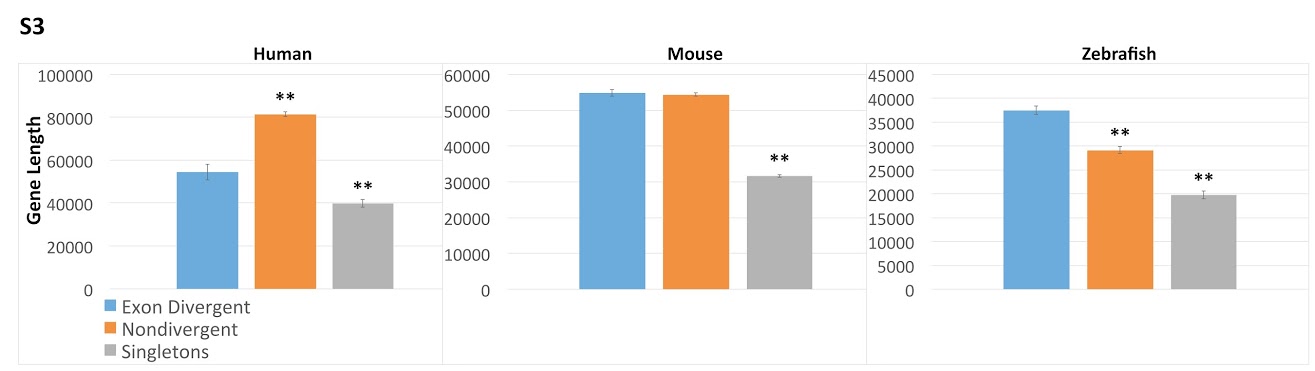


**Supplemental figure 3. Gene length.** Histograms comparing mean gene length of exon divergent (blue), nondivergent paralogs (orange) and singletons (grey). Student’s *t*-test was used to calculate significance levels. The asterisks indicate the significance of the difference as compared to exon divergent paralogs, **p < .01 *p< .05.
