# Supplementary material for: Evidence for widespread subfunctionalization of splice forms in vertebrate genomes
Source: HighWire-hosted journal article supplement (doi:10.1101/gr.184473.114), 2015-03-19
Supplement: Supp_Fig4.docx [file Supp_Fig4.docx]

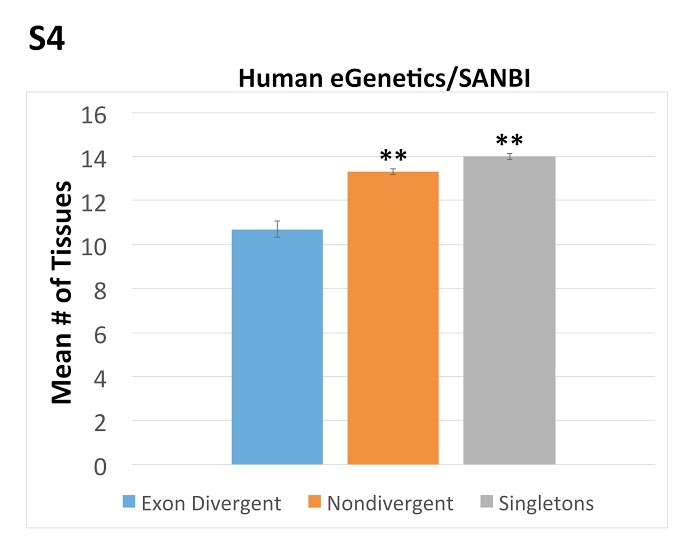


**Supplemetal figure 4. Exon divergent paralogs are expressed in fewer tissue types**. For an independent estimate of the number tissues in which each gene is expressed we queried the egenetics/SANBI gene expression database. Exon divergent paralogs (blue) are expressed in significantly fewer tissue types than both nondivergent paralogs (orange) and singletons (grey). Student’s *t*-test was used to calculate significance levels. The asterisks indicate the significance of the difference as compared to exon divergent paralogs, **p < .01 *p< .05.
