# Supplementary material for: Evidence for widespread subfunctionalization of splice forms in vertebrate genomes
Source: HighWire-hosted journal article supplement (doi:10.1101/gr.184473.114), 2015-03-19
Supplement: Supp_Table.docx [file Supp_Table.docx]

**Table 1. Structural evidence of splice form subfunctionalization.** Human genes orthologous to zebrafish paralogs that show evidence of splice form subfunctionalization**.**

|  |  |  |  |  |
| --- | --- | --- | --- | --- |
| Human gene symbol | Human transcript 1 exon count | Human transcript 2 exon count | Zebrafish paralog  1 exon count | Zebrafish paralog 2 exon count |
| *RNF145* | 10 | 11 | 10 | 11 |
| *PCYT1A* | 9 | 10 | 9 | 10 |
| *HMBOX1* | 9 | 10 | 8 | 9 |
| *ATP6V0A1* | 21 | 22 | 21 | 22 |
| *KCTD6* | 2 | 3 | 2 | 3 |
| *GTF2H1* | 14 | 15 | 12 | 15 |
| *PIP4K2C* | 10 | 11 | 10 | 11 |
| *DNAL1* | 4 | 8 | 6 | 8 |
| *PIAS1* | 14 | 15 | 14 | 15 |
| *TENM2* | 25 | 28 | 25 | 28 |
| *GNA13* | 4 | 4 | 3 | 4 |
| *PPM1A* | 4 | 6 | 4 | 6 |
| *SLC8A1* | 7 | 11 | 7 | 11 |
| *SLC4A4* | 23 | 26 | 22 | 26 |
| *OSBPL1A* | 14 | 28 | 13 | 28 |
| *EFNA5* | 4 | 5 | 4 | 5 |
| *PDGFA* | 6 | 7 | 6 | 7 |
| *KIF5A* | 26 | 29 | 26 | 29 |
| *CNNM2A* | 7 | 8 | 7 | 8 |
| *GABRA2* | 9 | 11 | 8 | 11 |
| *SDHB* | 5 | 8 | 5 | 8 |
| *TAOK1* | 18 | 20 | 18 | 20 |
| *YME1L1* | 8 | 18 | 9 | 18 |
| *PACRG* | 3 | 5 | 3 | 5 |
| *CCDC132* | 12 | 28 | 12 | 28 |
